# Supplementary material
Source: PubMed Central journal article supplement (PMC3012480)
Supplement: 1011624108_pnas.201011624SI.pdf [file 1011624108_pnas.201011624SI.pdf]

# Supporting Information

Edfeldt et al. 10.1073/pnas.1011624108

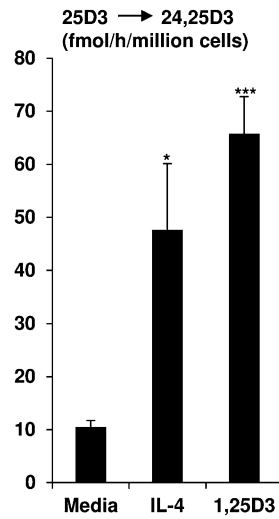

**Fig. S1.** Primary monocytes treated with IL-4 ( $10^3$  U/mL) or 1,25D<sub>3</sub> ( $10^{-8}$ M) for 48 h were cultured with [<sup>3</sup>H]-25D<sub>3</sub> for 5 h and the amount of conversion to [<sup>3</sup>H]-24,25D<sub>3</sub> was measured by HPLC. Data represent mean values  $\pm$  SEM from five independent experiments (\* $P$  < 0.05, \*\*\* $P$  < 0.001).

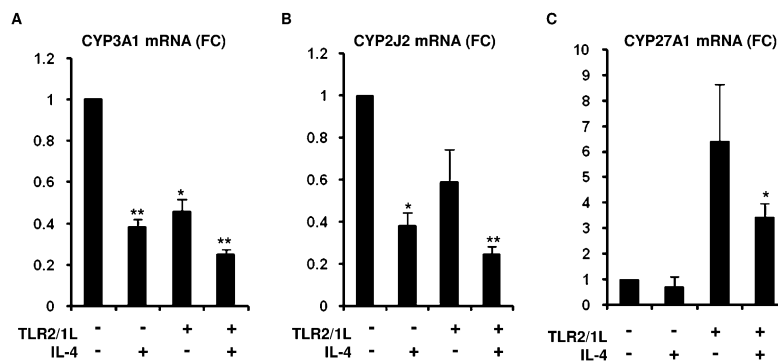

**Fig. S2.** mRNA expression levels of cytochrome p450 enzymes in TLR2/1 activated monocytes with or without IL-4. Primary human monocytes were stimulated as in Fig. 5A and mRNA levels of CYP3A4 (A), CYP2J2 (B), and CYP27A1 (C) were determined by qPCR. Fold change (FC) was calculated as ratio to media control cells (-). Data represent mean values  $\pm$  SEM from three to five independent experiments (\* $P$  < 0.05, \*\* $P$  < 0.01).
